# Supplementary material
Source: publisher figshare collection journal article supplement (https://gsajournals.figshare.com/ndownloader/files/26016650)
Supplement: Supplementary file 1 [file 26016650]

## Sheet: table S6
Table S6. List of oligos used in this study.
Oligo ID	Name	Sequence
oCN486	cs-lin-14 RNAi F	TAAGCAGGTACCCAACAGCAACCAACCCGTTTGTG
oCN487	cs-lin-14 RNAi R	TAAGCAGGTACCTTACTGCGATGGAGGCGGCGAC
oCN488	cs-lin-28 RNAi F	TAAGCAGGTACCGCCAACGCCGCGCTACTTTG
oCN489	cs-lin-28 RNAi R	TAAGCAGGTACCATTCGTCGTCCGCGTCCTTC
oCN490	cs-lin-41-RNAi F	TAAGCAGGTACCGAAACGCTCCCGGACTGGAG
oCN491	cs-lin-41 RNAi R	TAAGCAGGTACCCTAGAAGACACGGATGCAGTTGTTGC
oCN492	cs-hbl-1 RNAi F	TAAGCAGGTACCCGAAGCCTCCATGCATAGGGTC
oCN493	cs-hbl-1 RNAi R	TAAGCAGGTACCTTAGTGGTGTTGCGTTGGGCAG
oCN494	cs-lin-29 RNAi F	TAAGCAGGTACCATCCACATTTGTCCGTTTTGCGG
oCN495	cs-lin-29 RNAi R	TAAGCAGGTACCCTTCATGTGATTGATGATACTTTGCGG
oCN501	cs-unc-22 RNAi F	TAAGCAGGTACCCACCCTCACTGCCACGAATGCG
oCN502	cs-unc-22 RNAi R	TAAGCAGGTACCGTGATCTCCCTTGTTGAGCGAGTCG
oCN532	cs-lin-46 RNAi F	TAAGCAGGTACCATGAATTCTGCCGGAGGTTTCCAC
oCN533	cs-lin-46 RNAi R	TAAGCAGGTACCTCAGAAGGCGGAAAGTGGAAGAG
oCN586	ce-lin-41 RNAi F	TAAGCAAAGCTTGACATGTGTCTGGCGTTGAAAATG
oCN587	ce-lin-41 RNAi R	TAAGCAGGTACCGAAGACACGGATGCAATTGTTTCCG
oCN545	5' C. sulstoni lin-41 HR+GFP	CTTGGAATCACTTGTTTGTGTCCCGAAACAAAGGAAAAATGAGTAAAGGAGAAGAACTTT
oCN546	GFP+linker	TCCACCTCCAGATCCACCTCCAGATCCACCTCCAGATTTGTATAGTTCGTCCATGCCATG
oCN547	3' C. sulstoni lin-41 linker+HR	TCAAGAGTCGGGCATCCGTTCGACACGTTAGACGCAGATCCACCTCCAGATCCACCTCCA
oCN551	crRNA C. sulstoni lin-41 N-term	/AltR1/rUrGrUrCrCrCrGrArArArCrArArArGrGrArArArArGrUrUrUrUrArGrArGrCrUrArUrGrCrU/AltR2/
oCN599	cm-let-7 geno F	GTACTGCCACTCCAAGAGAGTCG
oCN600	cm-let-7 geno R	ATTGCTCAAAGAGCCGGAAAACTG
	oligo (dT) 20	TTTTTTTTTTTTTTTTTTTT
